# Supplementary material for: The Gap Function: Evaluating Integer Programming Models over Multiple Right-Hand Sides
Source: Atypon-hosted journal article supplement (doi:10.1287/opre.2020.2003), 2021-09-27
Supplement: opre.2020.2003.sm1.pdf [file opre.2020.2003.sm1.pdf]

## Proofs of Statements

We provide proofs for important results in this electronic companion.

### EC.1. Section 2 Results

**COROLLARY 2** *For any  $\beta$  such that  $SDP(\beta)$  has an optimal solution, there exists an optimal solution  $\phi^*$  of  $SDP(\beta)$  such that  $\phi^*(\tilde{\beta}) = z_{IP}(\tilde{\beta})$  for all  $\tilde{\beta}$  satisfying  $S(\tilde{\beta}) \neq \emptyset$ .*

*Proof:* Let  $\phi^*$  be an extension of  $z_{IP}$  satisfying the claim of Proposition 1. Because the value function of a mixed-integer program is superadditive and nondecreasing (Jeroslow 1979),  $\phi^*$  is superadditive and nondecreasing. The function  $\phi^*$  is an extension of  $z_{IP}$ , so  $\phi^*(a^j) \geq c_j$  for all  $j \in \{1, \dots, n\}$ , which proves feasibility. Optimality is immediate.  $\square$

**PROPOSITION 2** *Suppose  $A \in \mathbb{Z}_+^{m \times n}$  and  $b \in \mathbb{Z}_+^m$ . The truncated value function  $z_{IP} \in \mathbb{R}^{|\widehat{\mathcal{B}}(0,b)|}$  is in the polyhedron  $\Phi(b)$ .*

One can prove Proposition 2 directly by verifying  $z_{IP}$  satisfies all of the constraints that define  $\Phi(b)$ .

**THEOREM 4** *Suppose  $A \in \mathbb{Z}_+^{m \times n}$  and  $b \in \mathbb{Z}_+^m$ . For each  $\beta \in \widehat{\mathcal{B}}(0,b)$ ,  $SDP2(\beta)$  is a strong dual to  $IP(\beta)$ .*

*Proof:* We embed the feasible region  $\Phi(\beta)$  in  $\mathbb{R}^{|\widehat{\mathcal{B}}(0,b)|}$ . Let  $\Phi_{emb}(\beta) = \{\phi \in \mathbb{R}^{|\widehat{\mathcal{B}}(0,b)|} \mid \phi \text{ satisfies (2a) – (2d) with respect to } \beta\}$ . Observe that  $\Phi(b) \subseteq \Phi_{emb}(\beta)$ , for all  $\beta \in \widehat{\mathcal{B}}(0,b)$ , and for any  $\phi \in \Phi(b)$ , there exists  $\phi_{emb} \in \Phi_{emb}(\beta)$  such that  $\phi_{emb}(\beta') = \phi(\beta')$ , for all  $\beta' \in \widehat{\mathcal{B}}(0,\beta)$ . Furthermore, because  $A$  and  $\beta$  are nonnegative,  $IP(\beta)$  is feasible, and by Assumption **A2**,  $IP(\beta)$  is bounded.

Define  $\phi^* \in \mathbb{R}^{|\widehat{\mathcal{B}}(0,b)|}$  such that  $\phi^*(\beta') = z_{IP}(\beta')$ , for all  $\beta' \in \widehat{\mathcal{B}}(0,b)$ . Then  $\phi^* \in \Phi(b)$ , which implies that  $\phi^* \in \Phi_{emb}(\beta)$ . Define the truncated vector  $\tilde{\phi} \in \mathbb{R}^{|\widehat{\mathcal{B}}(0,\beta)|}$  such that  $\tilde{\phi}(\beta') = \phi^*(\beta')$ , for all  $\beta' \in \widehat{\mathcal{B}}(0,\beta)$ . Then  $\tilde{\phi}(\beta) = \phi^*(\beta) = z_{IP}(\beta)$  and  $\tilde{\phi}$  satisfies (2a)-(2d) with respect to  $\beta$ , which implies that  $\tilde{\phi} \in \Phi(\beta)$ . Hence,  $\tilde{\phi}$  is an optimal solution for  $SDP2(\beta)$ .  $\square$

**COROLLARY 3** *Suppose  $A \in \mathbb{Z}_+^n$  and  $b \in \mathbb{Z}_+^m$ . For any  $\phi \in \Phi(b)$ ,  $\phi(\beta) \geq z_{IP}(\beta)$ , for all  $\beta \in \widehat{\mathcal{B}}(0,b)$ .*

The proof of Corollary 3 follows from Theorem 4 and is omitted.

**PROPOSITION 3**

(I) For any  $\beta \in \mathcal{B}(\tilde{b}, b)$ , there exists a  $\tilde{\beta} \in D^+$  with  $\tilde{\beta} \geq \beta$  such that  $z_{IP}(\tilde{\beta}) = z_{IP}(\beta)$ .

(II) For any  $\beta \in \mathcal{B}(\tilde{b}, b)$ , there exists a  $\tilde{\beta} \in D^-$  with  $\tilde{\beta} \leq \beta$  such that  $z_{IP}(\tilde{\beta}) = z_{IP}(\beta)$ .

*Proof:* We prove only (I) as (II) is analogous. If  $\beta \in D^+$ , the proof is trivial. Suppose  $\beta \in \mathcal{B}(\tilde{b}, b)$  is not level-set maximal. Let  $s^0 = 0$  and  $\beta^0 = \beta$ . Perform the following improvement procedure: for each  $i \in \{1, \dots, m\}$ , let  $s^i = \max\{s \in \mathbb{Z}_+ \mid \beta^{i-1} + s \cdot e_i \in \mathcal{B}(\tilde{b}, b), z_{IP}(\beta^{i-1} + s \cdot e_i) = z_{IP}(\beta)\}$  and  $\beta^i = \beta^{i-1} + s^i \cdot e_i$ . At the end of each improvement procedure (which consists of a finite number of iterations),  $z_{IP}(\beta^m) = z_{IP}(\beta^0) = z_{IP}(\beta)$ , and either  $\beta^m = \beta^0$  or  $\beta^m \neq \beta^0$ .

Suppose  $\beta^m \neq \beta^0$ . Then  $\beta^m \geq \beta^0$  and  $\beta_i^m \geq \beta_i^0 + 1$  for some  $i \in \{1, \dots, m\}$ . Because  $\mathcal{B}(\tilde{b}, b)$  is a finite set, this case can only occur finitely often. Suppose  $\beta^m = \beta^0$ . By definition,  $\beta^m$  is level-set maximal because there does not exist  $i \in \{1, \dots, m\}$  such that  $z_{IP}(\beta^m + e_i) = z_{IP}(\beta^m)$ . Hence, we conclude that after finitely many applications of the improvement procedure,  $\beta^m = \beta^0$  and  $\beta^m$  is level-set maximal with  $z_{IP}(\beta) = z_{IP}(\beta^m)$  and  $\beta^m \geq \beta$ .  $\square$

**THEOREM 5** *Level-set-minimal and level-set-maximal vectors are sufficient to bound the gap function. That is,*

$$(I) \quad \inf_{\beta \in \mathcal{B}(\tilde{b}, b)} \Gamma(\beta) = \inf_{\beta \in D^-} \Gamma(\beta).$$

$$(II) \quad \sup_{\beta \in \mathcal{B}(\tilde{b}, b)} \Gamma(\beta) = \sup_{\beta \in D^+} \Gamma(\beta).$$

$$(III) \quad \inf_{\beta \in \mathcal{B}^+(\tilde{b}, b)} \gamma(\beta) = \inf_{\beta \in D^+ \cap \mathcal{B}^+(\tilde{b}, b)} \gamma(\beta).$$

$$(IV) \quad \sup_{\beta \in \mathcal{B}^+(\tilde{b}, b)} \gamma(\beta) = \sup_{\beta \in D^- \cap \mathcal{B}^+(\tilde{b}, b)} \gamma(\beta).$$

*Proof:* We prove only (I) as the other proofs are similar. Suppose  $\tilde{\beta} \in \mathcal{B}(\tilde{b}, b) \setminus D^-$ . By Proposition 3, there exists  $\bar{\beta} \in D^-$  such that  $z_{IP}(\bar{\beta}) = z_{IP}(\tilde{\beta})$  and  $\bar{\beta} \leq \tilde{\beta}$ . By the monotonicity of  $z_{LP}$ ,  $\Gamma(\tilde{\beta}) \geq \Gamma(\bar{\beta}) \geq \inf_{\beta \in D^-} \Gamma(\beta)$ . Hence,  $\inf_{\beta \in \mathcal{B}(\tilde{b}, b)} \Gamma(\beta) \geq \inf_{\beta \in D^-} \Gamma(\beta)$ . Finally, we have that  $D^- \subseteq \mathcal{B}(\tilde{b}, b)$ , which implies  $\inf_{\beta \in D^-} \Gamma(\beta) \geq \inf_{\beta \in \mathcal{B}(\tilde{b}, b)} \Gamma(\beta)$  and proves the equality.  $\square$

**THEOREM 6** *The absolute gap function defined over rational vectors,  $\Gamma : \mathcal{B}(\tilde{b}, b) \cap \mathbb{Q}^m \rightarrow \mathbb{R}$ , is the minimum of finitely many Gomory functions.*

*Proof:* It is known that  $-z_{IP}(\beta) = \min\{-c^T x \mid Ax \leq \beta, x \in \mathbb{Z}_+^n\}$  is a Gomory function when defined over rational vectors (Blair and Jeroslow 1982). Also,  $z_{LP}(\beta) = \min\{(v^k)^T \beta \mid k \in \mathcal{K}\}$ . For each  $k \in \mathcal{K}$ , let  $L_k : \mathcal{B}(\tilde{b}, b) \cap \mathbb{Q}^m \rightarrow \mathbb{R}$ , where  $L_k(\beta) = (v^k)^T \beta - z_{IP}(\beta)$ . Notice that for each  $k \in \mathcal{K}$ ,  $L_k$  is a Gomory function, as it is the sum of two Gomory functions. Further,  $\Gamma(\beta) = \min\{(v^k)^T \beta \mid k \in \mathcal{K}\} - z_{IP}(\beta) = \min\{L_k(\beta) \mid k \in \mathcal{K}\}$ , for all  $\beta \in \mathcal{B}(\tilde{b}, b) \cap \mathbb{Q}^m$ .  $\square$

**PROPOSITION 4** *For any  $\beta \in \mathcal{B}(\tilde{b}, b)$ , if  $\hat{x} \in \text{opt}_{LP}(\beta)$ , then for all  $x$  such that  $0 \leq x \leq \hat{x}$ ,  $x \in \text{opt}_{LP}(\tilde{\beta})$ , for all  $\tilde{\beta} \in \Lambda(\beta, x, \hat{x})$ .*

*Proof:* From Assumption **A2**,  $|z_{LP}(\beta')| < \infty$ , for all  $\beta' \in \mathcal{B}(\tilde{\beta}, \beta)$ . Hence,  $\text{opt}_{LP}(\beta')$  and  $\text{opt}_{DLP}(\beta')$  are nonempty, for all  $\beta' \in \mathcal{B}(\tilde{\beta}, \beta)$ . Let  $v \in \text{opt}_{DLP}(\beta)$  and  $\hat{x} \in \text{opt}_{LP}(\beta)$ . Consider  $x \in \mathbb{R}^n$  such that  $0 \leq x \leq \hat{x}$ . For any  $\beta' \in \mathbb{R}^m$ , let  $M_{\beta'}^< = \{i \in \{1, \dots, m\} \mid a_i^T \hat{x} < \beta'_i\}$ . By linear programming complementary slackness:

- (I)  $v_i = 0$  for all  $i \in M_{\beta'}^<$ .
- (II)  $\hat{x}_j > 0 \Rightarrow (a^j)^T v = c_j$ .

We show that  $v$  also satisfies these two conditions when  $x$  replaces  $\hat{x}$  and  $\beta - A(\hat{x} - x)$  replaces  $\beta$  in (I) and (II). For condition (II), notice  $\{j : x_j > 0\} \subseteq \{j : \hat{x}_j > 0\}$ , since  $x_j \leq \hat{x}_j$ . This implies  $(a^j)^T v = c_j$ , for all  $j$  such that  $x_j > 0$ , which proves condition (II). Furthermore,  $M_{\beta - A(\hat{x} - x)}^< = M_{\beta}^<$ , since  $a_i^T \hat{x} < \beta_i$  if and only if  $a_i^T x < \beta_i - a_i^T(\hat{x} - x)$ . This implies condition (I) holds, so  $v \in \text{opt}_{DLP}(\beta - A(\hat{x} - x))$ . By assumption,  $v \in \text{opt}_{DLP}(\beta)$ , thus,  $\beta^T v = c^T \hat{x}$ . Hence, complementary slackness implies that  $0 = (\beta_i - a_i^T \hat{x})v_i = (\beta_i - a_i^T(\hat{x} - x) - a_i^T x)v_i$ . The vector  $x$  is feasible for  $\text{LP}(\beta - A(\hat{x} - x))$ . To see this, first note that  $x \in \mathbb{R}_+^n$ . Also  $\beta - A\hat{x} \geq 0$ , which implies  $Ax \leq Ax + \beta - A\hat{x} = \beta - A(\hat{x} - x)$ . By complementary slackness (primal solution  $x$ , dual solution  $v$ ),  $x \in \text{opt}_{LP}(\beta - A(\hat{x} - x))$ . By monotonicity,  $x \in \text{opt}_{LP}(\tilde{\beta})$ , for any  $\tilde{\beta} \in \Lambda(\beta, x, \hat{x})$ .  $\square$

**COROLLARY 4** *Let  $\beta, x, \hat{x}$  satisfy the conditions in Proposition 4. Suppose further that  $x \in \mathbb{Z}_+^n$ . Then for any  $\tilde{\beta} \in \Lambda(\beta, x, \hat{x})$ ,  $\Gamma(\tilde{\beta}) = 0$ .*

*Proof:* By Proposition 4,  $x \in \text{opt}_{LP}(\tilde{\beta})$ . Now,  $x \in \mathbb{Z}_+^n$ , thus  $x \in S(\tilde{\beta})$  and  $c^T x \leq z_{IP}(\tilde{\beta})$ . Therefore,  $c^T x = z_{LP}(\tilde{\beta}) \geq z_{IP}(\tilde{\beta}) \geq c^T x$ . Thus,  $z_{LP}(\tilde{\beta}) = z_{IP}(\tilde{\beta})$ , and  $\Gamma(\tilde{\beta}) = 0$ .  $\square$

LEMMA EC.1. (Nemhauser and Wolsey 1988) *Suppose  $\hat{x} \in \text{opt}_{IP}(\beta)$ , for some  $\beta \in \mathcal{B}(\tilde{b}, b)$  and  $\phi^*$  is an optimal solution to  $\text{SDP}(\beta)$ . Then  $\phi^*(Ax) = c^T x$  and  $\phi^*(Ax) + \phi^*(\beta - Ax) = \phi^*(\beta)$ , for all  $x \in \mathbb{Z}_+^n$  such that  $x \leq \hat{x}$ .*

PROPOSITION 5 *Let  $\beta \in \mathcal{B}(\tilde{b}, b)$ . For all  $j \in \{1, \dots, n\}$  such that there exists  $x^I \in \text{opt}_{IP}(\beta)$  and  $x^L \in \text{opt}_{LP}(\beta)$  with  $x_j^I \geq 1$  and  $x_j^L \geq 1$ , we have  $z_{LP}(\beta - a^j) = z_{LP}(\beta) - c_j$ , and  $z_{IP}(\beta - a^j) = z_{IP}(\beta) - c_j$ .*

*Proof:* Let  $e_j$  be the  $j^{\text{th}}$  standard basis vector in  $\mathbb{R}^n$ , which implies  $e_j \in \mathbb{Z}_+^n$ . By hypothesis,  $e_j \leq x^I$  and  $e_j \leq x^L$ . Recall that  $z_{IP}$  can be extended to an optimal solution  $\phi^*$  of  $\text{SDP}(\beta)$  (Corollary 2) so that  $\phi^*(\beta) = z_{IP}(\beta)$ , for all  $\beta$  such that  $S(\beta) \neq \emptyset$ . By Lemma EC.1,  $z_{IP}(\beta - Ae_j) = z_{IP}(\beta - a^j) = \phi^*(\beta - a^j) = \phi^*(\beta) - \phi^*(a^j) = z_{IP}(\beta) - z_{IP}(a^j)$ .

Observe that  $\beta - A(x^L - e_j) = a^j + \beta - Ax^L \geq a^j$ . Thus,  $a^j \in \Lambda(\beta, e_j, x^L)$ . By Proposition 4,  $e_j \in \text{opt}_{LP}(a^j)$ . This implies that  $z_{LP}(a^j) = c_j$ . Because  $e_j \in S(a^j)$ ,  $z_{IP}(a^j) = c_j$ . Therefore,  $z_{IP}(\beta - a^j) = z_{IP}(\beta) - c_j$ .

By the superadditivity of  $z_{LP}$ ,  $z_{LP}(\beta - a^j) \leq z_{LP}(\beta) - z_{LP}(a^j) = z_{LP}(\beta) - c_j$ . Observe that  $x^L - e_j \in P(\beta - a^j)$ . Therefore,  $z_{LP}(\beta - a^j) \geq c^T(x^L - e_j) = z_{LP}(\beta) - c_j$ . This implies  $z_{LP}(\beta - a^j) = z_{LP}(\beta) - c_j$ .  $\square$

THEOREM 7 *Under the conditions of Proposition 5,  $\Gamma(\beta - a^j) = \Gamma(\beta)$ . If, in addition,  $z_{LP}(\beta) > c_j$  and  $z_{IP}(\beta) \geq c_j$ , then  $\gamma(\beta - a^j) = (z_{IP}(\beta) - c_j)/(z_{LP}(\beta) - c_j)$ .*

We omit the proof of Theorem 7 as it follows from Proposition 5.

THEOREM 8 *Let  $\beta \in \widehat{\mathcal{B}}(0, b)$  and suppose  $A \in \mathbb{Z}_+^{m \times n}$  and  $b \in \mathbb{Z}_+^m$ . Suppose there exists an  $x \in \text{opt}_{IP}(\beta)$  such that  $x_j \geq 1$  for some  $j \in \{1, \dots, n\}$ . Then for any optimal solution  $\phi^*$  to  $\text{SDP}2(\beta)$ ,  $\phi^*(\beta - a^j) = z_{IP}(\beta - a^j)$ .*

*Proof:* By an argument similar to that shown in the proof of Proposition 5,  $z_{IP}(\beta - a^j) = z_{IP}(\beta) - z_{IP}(a^j)$ . Because  $(\beta - a^j) + a^j = \beta \in \widehat{\mathcal{B}}(0, b)$  and  $\phi^*$  is an optimal solution to  $\text{SDP}2(\beta)$ ,

$$\phi^*(\beta - a^j) + \phi^*(a^j) \leq \phi^*(\beta)$$

$$\begin{aligned}
&= z_{IP}(\beta) \\
&\iff \phi^*(\beta - a^j) \leq z_{IP}(\beta) - \phi^*(a^j).
\end{aligned}$$

The first inequality comes from the superadditive constraints in  $\text{SDP2}(\beta)$ , and the equality is due to  $\text{SDP2}(\beta)$  being a strong dual (Theorem 4). By Corollary 3,  $\phi^*(a^j) \geq z_{IP}(a^j)$ , which implies that

$$\begin{aligned}
\phi^*(\beta - a^j) &\leq z_{IP}(\beta) - z_{IP}(a^j) \\
&= z_{IP}(\beta - a^j).
\end{aligned}$$

By Corollary 3,  $\phi^*(\beta - a^j) \geq z_{IP}(\beta - a^j)$ , which proves the desired equality.  $\square$

## EC.2. Section 3 Results

PROPOSITION 6 *The optimal objective value of (3) is  $\mathbb{E}_{\xi^{(1)}}[\Gamma(\xi^{(1)})]$ .*

*Proof:* Let  $(\tilde{\phi}, \tilde{\psi}) = (z_{IP}, \Gamma)$ , the truncated value function and the truncated gap function. Observe that  $\tilde{\phi} \in \Phi(b)$  (Proposition 2). Consider  $\beta \in \widehat{\mathcal{B}}(0, b)$ . Then  $\tilde{\psi}(\beta) = \Gamma(\beta) = z_{LP}(\beta) - z_{IP}(\beta) \leq \beta^T v^k - \tilde{\phi}(\beta)$ , for all  $k \in \mathcal{K}$ . Hence the solution is feasible.

Let  $(\bar{\phi}, \bar{\psi})$  be a feasible solution for (3). Because  $\bar{\phi}$  satisfies (3c), by Corollary 3,  $\bar{\phi}(\beta) \geq z_{IP}(\beta)$ , for all  $\beta \in \widehat{\mathcal{B}}(0, b)$ . By (3a), for each  $\beta \in \widehat{\mathcal{B}}(0, b)$ ,  $\bar{\psi}(\beta) \leq \beta^T v^k - \bar{\phi}(\beta) \leq \beta^T v^k - z_{IP}(\beta)$ , for all  $k \in \mathcal{K}$ . This implies that  $\bar{\psi}(\beta) \leq z_{LP}(\beta) - z_{IP}(\beta) = \tilde{\psi}(\beta)$  and  $\sum_{\beta \in \widehat{\mathcal{B}}(0, b)} \mu^{(1)}(\beta) \bar{\psi}(\beta) \leq \sum_{\beta \in \widehat{\mathcal{B}}(0, b)} \mu^{(1)}(\beta) \tilde{\psi}(\beta)$ .

Thus,  $(\tilde{\phi}, \tilde{\psi})$  is an optimal solution to (3), and the optimal objective value is  $\mathbb{E}_{\xi^{(1)}}[\Gamma(\xi^{(1)})]$ .  $\square$

COROLLARY 5 *Suppose  $\mu^{(1)}(\beta) > 0$  for all  $\beta \in \widehat{\mathcal{B}}(0, b)$ . Then, any feasible solution  $(\bar{\phi}, \bar{\psi})$  in which  $\bar{\phi} \neq z_{IP}$  is not optimal for (3).*

One can prove Corollary 5 by noticing that every component of an optimal solution  $\phi^*$  of (3) must be as small as possible. We omit a formal proof.

COROLLARY 6 *Let  $(\tilde{\phi}, \tilde{\psi})$  be an optimal solution to (3) and  $\delta_{EAD}$  the optimal objective value. Then the variance of the absolute gap over  $\widehat{\mathcal{B}}(0, b)$  can be calculated as follows:*

$$\sigma_{\Gamma}^2 = \sum_{\beta \in \widehat{\mathcal{B}}(0, b)} \mu^{(1)}(\beta) (\tilde{\psi}(\beta))^2 - \delta_{EAD}^2.$$

*Proof:* For any  $\beta \in \widehat{\mathcal{B}}(0, b)$  such that  $\mu^{(1)}(\beta) > 0$ ,  $\tilde{\phi}(\beta) = z_{IP}(\beta)$ ; otherwise,  $(\tilde{\phi}, \tilde{\psi})$  is not an optimal solution. It follows that for all such  $\beta$ ,  $\tilde{\psi}(\beta) = \Gamma(\beta)$ . Hence,

$$\sum_{\beta \in \widehat{\mathcal{B}}(0, b)} \mu^{(1)}(\beta) (\tilde{\psi}(\beta))^2 = \sum_{\beta: \mu^{(1)}(\beta) > 0} \mu^{(1)}(\beta) (\tilde{\psi}(\beta))^2 = \sum_{\beta: \mu^{(1)}(\beta) > 0} \mu^{(1)}(\beta) (\Gamma(\beta))^2 = \mathbb{E}_{\xi^{(1)}} [(\Gamma(\xi^{(1)}))^2].$$

Therefore,  $\sum_{\beta \in \widehat{\mathcal{B}}(0, b)} \mu^{(1)}(\beta) (\tilde{\psi}(\beta))^2 - \delta_{EAD}^2 = \mathbb{E}_{\xi^{(1)}} [(\Gamma(\xi^{(1)}))^2] - \mathbb{E}_{\xi^{(1)}} [\Gamma(\xi^{(1)})]^2 = \sigma_{\Gamma}^2. \quad \square$

**PROPOSITION 7** *The optimal objective value of (4) is  $\Delta_{SAD}$ .*

*Proof:* Let  $\tilde{\beta} \in \arg \max\{\Gamma(\beta) \mid \beta \in \widehat{\mathcal{B}}(0, b)\}$ . Let  $\tilde{\phi} = z_{IP}$ ,  $\tilde{\psi}(\tilde{\beta}) = \Gamma(\tilde{\beta})$ , and  $\tilde{\psi}(\beta) = 0$  for all  $\beta \in \widehat{\mathcal{B}}(0, b) \setminus \tilde{\beta}$ . It is immediate that  $\tilde{\phi} \in \Phi(b)$  (Proposition 2). By construction,  $\tilde{\psi}$  satisfies (4b). Now,  $\tilde{\psi}(\tilde{\beta}) = \Gamma(\tilde{\beta})$ , and  $\tilde{\psi}(\beta) = 0 \leq \Gamma(\beta)$ , for all  $\beta \in \widehat{\mathcal{B}}(0, b) \setminus \tilde{\beta}$ . Thus,  $\tilde{\psi}(\beta) \leq \Gamma(\beta) = z_{LP}(\beta) - z_{IP}(\beta) \leq \beta^T v^k - \tilde{\phi}(\beta)$ , for all  $k \in \mathcal{K}$ .

Let  $(\bar{\phi}, \bar{\psi})$  be feasible for (4), where  $\bar{\psi}(\beta) = 0$  for all  $\beta \in \widehat{\mathcal{B}}(0, b) \setminus \bar{\beta}$ , for some  $\bar{\beta} \in \widehat{\mathcal{B}}(0, b)$ . Because  $\bar{\phi}$  satisfies (4d), by Corollary 3,  $\bar{\phi}(\beta) \geq z_{IP}(\beta)$  for all  $\beta \in \widehat{\mathcal{B}}(0, b)$ . By (4a),  $\bar{\psi}(\bar{\beta}) \leq z_{LP}(\bar{\beta}) - \bar{\phi}(\bar{\beta}) \leq z_{LP}(\bar{\beta}) - z_{IP}(\bar{\beta}) = \Gamma(\bar{\beta})$ . Because  $\tilde{\beta} \in \arg \max\{\Gamma(\beta) \mid \beta \in \widehat{\mathcal{B}}(0, b)\}$ ,  $\bar{\psi}(\bar{\beta}) = \Gamma(\bar{\beta}) \leq \Gamma(\tilde{\beta}) = \tilde{\psi}(\tilde{\beta})$ , which implies  $\sum_{\beta \in \widehat{\mathcal{B}}(0, b)} \bar{\psi}(\beta) \leq \sum_{\beta \in \widehat{\mathcal{B}}(0, b)} \tilde{\psi}(\beta) = \max\{\Gamma(\beta) \mid \beta \in \widehat{\mathcal{B}}(0, b)\} = \Delta_{SAD}. \quad \square$

**PROPOSITION 8** *The optimal objective value of (5) is  $\Delta_{IAD}$ .*

*Proof:* For each  $\beta \in \widehat{\mathcal{B}}(0, b)$ , let  $\tilde{\phi}(\beta) = z_{IP}(\beta)$ . Let  $\tilde{\psi} = \Delta_{IAD}$ . It is immediate that  $\tilde{\phi} \in \Phi(b)$  (Proposition 2). Further,  $\tilde{\psi} = \Delta_{IAD} \leq \Gamma(\beta) \leq \beta^T v^k - z_{IP}(\beta) = \beta^T v^k - \tilde{\phi}(\beta)$ , for all  $\beta \in \widehat{\mathcal{B}}(0, b) \setminus \{0\}$ ,  $k \in \mathcal{K}$ . Thus,  $(\tilde{\phi}, \tilde{\psi})$  is feasible for (5).

Let  $(\bar{\phi}, \bar{\psi})$  be feasible for (5). Recall that for all  $\beta \in \widehat{\mathcal{B}}(0, b)$ , by Corollary 3,  $z_{IP}(\beta) \leq \bar{\phi}(\beta)$ . By (5a), for all  $\beta \in \widehat{\mathcal{B}}(0, b) \setminus \{0\}$  and  $k \in \mathcal{K}$ ,  $\bar{\psi} \leq \beta^T v^k - \bar{\phi}(\beta)$ , which implies  $\bar{\psi} \leq z_{LP}(\beta) - z_{IP}(\beta) = \Gamma(\beta)$ . Hence,  $\bar{\psi} \leq \Delta_{IAD} = \tilde{\psi}$ . This proves that  $(\tilde{\phi}, \tilde{\psi})$  is optimal for (5).  $\square$

### EC.3. Section 4 Results

**PROPOSITION 9** *The optimal objective value of (6) is  $\delta_{EAH} = \mathbb{E}_{\xi^{(p)}}[\Gamma(\xi^{(p)})]$ .*

*Proof:* The proof is similar to that of Proposition 6; however, we present a proof to illustrate the new details introduced by the use of  $\widehat{\mathcal{B}}_p(0, b)$ . Let  $(\tilde{\phi}, \tilde{\psi}) = (z_{IP}, \Gamma)$ , where  $\tilde{\psi} \in \mathbb{R}^{|\widehat{\mathcal{B}}_p(0, b)|}$ . Observe that

$\tilde{\phi} \in \Phi(b)$  (Proposition 2). Consider  $\beta \in \widehat{\mathcal{B}}_p(0, b)$ . Then  $\tilde{\psi}(\beta) = \Gamma(\beta) = z_{LP}(\beta) - z_{IP}(\beta) = z_{LP}(\beta) - z_{IP}(\lfloor \beta \rfloor) \leq \beta^T v^k - \tilde{\phi}(\lfloor \beta \rfloor)$ , for all  $k \in \mathcal{K}$ . Hence the solution is feasible.

Let  $(\bar{\phi}, \bar{\psi})$  be a feasible solution for (6). Because  $\bar{\phi}$  satisfies (6c), by Corollary 3,  $\bar{\phi}(\beta) \geq z_{IP}(\beta)$ , for all  $\beta \in \widehat{\mathcal{B}}(0, b)$ . By (6a), for each  $\beta \in \widehat{\mathcal{B}}_p(0, b)$ ,  $\bar{\psi}(\beta) \leq \beta^T v^k - \bar{\phi}(\lfloor \beta \rfloor) \leq \beta^T v^k - z_{IP}(\beta)$ , for all  $k \in \mathcal{K}$ . This implies that  $\bar{\psi}(\beta) \leq z_{LP}(\beta) - z_{IP}(\beta) = \tilde{\psi}(\beta)$  and  $\sum_{\beta \in \widehat{\mathcal{B}}(0, b)} \mu^{(p)}(\beta) \bar{\psi}(\beta) \leq \sum_{\beta \in \widehat{\mathcal{B}}(0, b)} \mu^{(p)}(\beta) \tilde{\psi}(\beta)$ .

Thus,  $(\tilde{\phi}, \tilde{\psi})$  is an optimal solution to (6), and the optimal objective value is  $\mathbb{E}_{\xi^{(p)}}[\Gamma(\xi^{(p)})]$ .  $\square$

**COROLLARY 7** *Suppose  $\mu^{(p)}(\beta) > 0$  for all  $\beta \in \widehat{\mathcal{B}}_p(0, b)$ . Then, any feasible solution  $(\bar{\phi}, \bar{\psi})$  in which  $\bar{\phi} \neq z_{IP}$  is not optimal for (6).*

We omit the proof of Corollary 7 due to reasoning similar to that of Corollary 5.

**COROLLARY 8** *Let  $(\tilde{\phi}, \tilde{\psi})$  be an optimal solution to (6) and  $\delta_{EAH}$  the optimal objective value. Then the variance of the absolute gap over  $\widehat{\mathcal{B}}_p(0, b)$  can be calculated as follows:*

$$\sigma_{\Gamma}^2 = \sum_{\beta \in \widehat{\mathcal{B}}_p(0, b)} \mu^{(p)}(\beta) (\tilde{\psi}(\beta))^2 - \delta_{EAH}^2.$$

The proof of Corollary 8 is similar to that of Corollary 6 and is omitted.

**LEMMA EC.2.** *For any  $\beta \in \mathcal{B}(0, b)$ :*

- (I)  $\|\beta - \lfloor \beta \rfloor^{(p)}\|_{\infty} \leq 1/p$ .
- (II)  $z_{IP}(\lfloor \beta \rfloor^{(p)}) = z_{IP}(\beta)$ .
- (III)  $\Gamma(\beta) \geq \Gamma(\lfloor \beta \rfloor^{(p)})$ .

*Proof:* Let  $\beta \in \mathcal{B}(0, b)$ . For any  $i \in \{1, \dots, m\}$ ,  $|\beta_i - (\lfloor \beta \rfloor^{(p)})_i| = \beta_i - (\lfloor \beta \rfloor^{(p)})_i = \frac{\alpha_i - \lfloor \alpha_i \rfloor}{p} \leq 1/p$ , where  $\beta = \alpha/p$ . This proves (I). Also,  $\lfloor \beta \rfloor = \lfloor (\lfloor \beta \rfloor^{(p)}) \rfloor$ , and (II) follows. The monotonicity of  $z_{LP}$  and (II) imply (III).  $\square$

**PROPOSITION 10** *(Mangasarian and Shiao 1987) The linear programming value function  $z_{LP}$  is Lipschitz continuous over  $\mathcal{B}(0, b)$ .*

*Proof:* Mangasarian and Shiao (1987) show that over the set of right-hand sides for which the linear program is feasible, the optimal solutions follow a Lipschitzian relationship. That is, for any

$\beta^1, \beta^2$  such that  $z_{LP}(\beta^1)$  and  $z_{LP}(\beta^2)$  are finite, there exist optimal solutions  $x^1 \in \text{opt}_{LP}(\beta^1), x^2 \in \text{opt}_{LP}(\beta^2)$  such that  $\|x^1 - x^2\|_S \leq M' \|\beta^1 - \beta^2\|_R$ , where  $\|\cdot\|_S$  is a norm on  $\mathbb{R}^n$  and  $\|\cdot\|_R$  is a norm on  $\mathbb{R}^m$ .  $LP(\beta)$  is feasible and bounded for all  $\beta \in \mathcal{B}(0, b)$ , and the objective function is linear. Hence  $z_{LP}$  is Lipschitz continuous over  $\mathcal{B}(0, b)$ .  $\square$

**THEOREM 9** *Suppose that for all  $\beta \in \widehat{\mathcal{B}}_p(0, b), \mu^{(p)}(\beta) > 0$ . Let  $(\tilde{\phi}, \tilde{\psi})$  be an optimal solution to (6), and define the extension  $\tilde{\psi}_p : \mathcal{B}(0, b) \rightarrow \mathbb{R}$  by  $\tilde{\psi}_p(\beta) = \tilde{\psi}_p(\lfloor \beta \rfloor^{(p)})$ . Then the following results hold:*

$$\|\Gamma - \tilde{\psi}_p\|_\infty \leq M/p, \quad (\text{EC.1a})$$

$$\mathbb{E}_\xi |\Gamma(\xi) - \tilde{\psi}_p(\xi)| = \mathbb{E}_\xi (\Gamma(\xi) - \tilde{\psi}_p(\xi)) \leq M/p. \quad (\text{EC.1b})$$

*Proof:* Let  $\beta \in \mathcal{B}(0, b)$ . By Lemma EC.2 ((II) and (III)) and Corollary 7,  $|\Gamma(\beta) - \tilde{\psi}_p(\beta)| = |\Gamma(\beta) - \tilde{\psi}(\lfloor \beta \rfloor^{(p)})| = |\Gamma(\beta) - \Gamma(\lfloor \beta \rfloor^{(p)})| = \Gamma(\beta) - \Gamma(\lfloor \beta \rfloor^{(p)}) = z_{LP}(\beta) - z_{LP}(\lfloor \beta \rfloor^{(p)})$ . By the definition of the Lipschitz constant  $M$  and Lemma EC.2 (I),  $z_{LP}(\beta) - z_{LP}(\lfloor \beta \rfloor^{(p)}) \leq M \|\beta - \lfloor \beta \rfloor^{(p)}\|_\infty \leq M/p$ . This proves (EC.1a). (EC.1b) follows from

$$\begin{aligned} \mathbb{E}_\xi |\Gamma(\xi) - \tilde{\psi}_p(\xi)| &= \int_{\beta \in \mathcal{B}(0, b)} |\Gamma(\beta) - \tilde{\psi}_p(\beta)| \mu(\beta) d\beta \\ &= \int_{\beta \in \mathcal{B}(0, b)} (\Gamma(\beta) - \tilde{\psi}_p(\beta)) \mu(\beta) d\beta \\ &\leq M/p \int_{\beta \in \mathcal{B}(0, b)} \mu(\beta) d\beta \\ &= M/p. \end{aligned} \quad \square$$

**THEOREM 10** *Suppose the probability mass function  $\mu^{(p)}$  approximates the probability density function  $\mu$  as follows:  $\mu^{(p)}(b^t) = \int_{\mathcal{B}^t} \mu(\beta) d\beta$ , for all  $t \in \{1, \dots, T^{(p)}\}$ . Then, the difference between the expectation of the absolute gap function over  $\mathcal{B}(0, b)$  and the optimal objective value of (6) is bounded. Specifically,  $|\mathbb{E}_\xi [\Gamma(\xi)] - \delta_{EAH}| \leq M/p$ .*

*Proof:* Observe:

$$|\mathbb{E}_\xi [\Gamma(\xi)] - \delta_{EAH}| = \left| \int_{\mathcal{B}(0, b)} \mu(\beta) \Gamma(\beta) d\beta - \sum_{\beta \in \widehat{\mathcal{B}}_p} \mu^{(p)}(\beta) \Gamma(\beta) \right|$$

$$\begin{aligned}
&= \left| \int_{\mathcal{B}(0,b)} \mu(\beta) \Gamma(\beta) d\beta - \sum_{t \in T^{(p)}} \mu^{(p)}(\beta) \Gamma(\beta) \right| \\
&= \left| \sum_{t \in T^{(p)}} \int_{\mathcal{B}^t} \mu(\beta) \Gamma(\beta) d\beta - \sum_{t \in T^{(p)}} \int_{\mathcal{B}^t} d\beta \Gamma(b^t) \right| \\
&= \left| \sum_{t \in T^{(p)}} \int_{\mathcal{B}^t} \mu(\beta) (\Gamma(\beta) - \Gamma(b^t)) d\beta \right| \\
&\leq \sum_{t \in T^{(p)}} \int_{\mathcal{B}^t} |\mu(\beta) (\Gamma(\beta) - \Gamma(b^t))| d\beta \\
&\leq \sum_{t \in T^{(p)}} \int_{\mathcal{B}^t} \mu(\beta) M/p d\beta \\
&= M/p \int_{\mathcal{B}(0,b)} \mu(\beta) d\beta \\
&= M/p. \quad \square
\end{aligned}$$

LEMMA EC.3. Let  $l \in \{1, \dots, L\}$ . For any  $\epsilon > 0$ , there exists  $\beta \in (\mathcal{B}^l)^\circ$  such that  $z_{LP}(d^l) - z_{LP}(\beta) < \epsilon$ , where  $(\mathcal{B}^l)^\circ$  denotes the interior of  $\mathcal{B}^l$ .

*Proof:* Fix  $\epsilon > 0$ . Notice that if  $z_{LP}(d^l) = 0$ , then  $z_{LP}(\beta) = 0$  for all  $\beta \in (\mathcal{B}^l)^\circ$ . Now assume  $z_{LP}(d^l) \neq 0$ , and let  $\delta = \frac{1}{2} \min \left\{ \frac{\epsilon}{z_{LP}(d^l)}, \frac{1}{\max_{i \in \{1, \dots, m\}} d_i^l} \right\}$ . Define  $\beta = (1 - \delta)d^l$ . Thus,  $\beta \in (\mathcal{B}^l)^\circ$ . Choose  $x^d \in \text{opt}_{LP}(d^l)$  and let  $x^\beta = (1 - \delta)x^d$ . Then,  $Ax^\beta = (1 - \delta)Ax^d \leq (1 - \delta)d^l = \beta$ . Thus,  $x^\beta \in P(\beta)$ . It follows that  $z_{LP}(\beta) \geq c^T x^\beta = (1 - \delta)c^T x^d = z_{LP}(d^l) - \delta z_{LP}(d^l) \geq z_{LP}(d^l) - \frac{\epsilon}{2z_{LP}(d^l)} z_{LP}(d^l) = z_{LP}(d^l) - \frac{\epsilon}{2} > z_{LP}(d^l) - \epsilon$ . Further,  $z_{LP}(d^l) \geq z_{LP}(\beta)$  because  $z_{LP}$  is increasing.  $\square$

PROPOSITION 11 For any unit hyper-cube  $\mathcal{B}^l$ ,  $\sup_{\beta \in \mathcal{B}^l} \Gamma(\beta) = z_{LP}(d^l) - z_{IP}(b^l)$ .

*Proof:* For any  $\beta \in \mathcal{B}^l$ ,  $z_{LP}(\beta) \leq z_{LP}(d^l)$  and  $z_{IP}(b^l) \leq z_{IP}(\beta)$ , which implies  $z_{LP}(\beta) - z_{IP}(\beta) \leq z_{LP}(d^l) - z_{IP}(b^l)$ . Fix  $\epsilon > 0$ . By Lemma EC.3, there exists  $\beta^* \in (\mathcal{B}^l)^\circ$  such that  $z_{LP}(d^l) - z_{LP}(\beta^*) < \epsilon$ . Because  $A \in \mathbb{Z}^{m \times n}$  and  $\lfloor \beta^* \rfloor = b^l$ , we have that  $z_{IP}(\beta^*) = z_{IP}(b^l)$ . Therefore,  $[z_{LP}(d^l) - z_{IP}(b^l)] - [z_{LP}(\beta^*) - z_{IP}(\beta^*)] < \epsilon$ . Therefore,  $z_{LP}(d^l) - z_{IP}(b^l) = \sup_{\beta \in \mathcal{B}^l} [z_{LP}(\beta) - z_{IP}(\beta)] = \sup_{\beta \in \mathcal{B}^l} \Gamma(\beta)$ .  $\square$

COROLLARY 9  $\Delta_{SAH} = \sup_{\beta \in \mathcal{B}(0,b)} \Gamma(\beta) = \sup_{l \in \{1, \dots, L\}} z_{LP}(d^l) - z_{IP}(b^l)$ .

We omit the proof of Corollary 9 as it follows from Proposition 11.

**PROPOSITION 12** *The optimal solution of (8) is  $\Delta_{SAH}$ .*

*Proof:* Let  $\tilde{\beta} \in \arg \max\{z_{LP}(r(\beta)) - z_{IP}(\beta) \mid \beta \in \widehat{\mathcal{B}}(0, b)\}$  so that  $z_{LP}(r(\tilde{\beta})) - z_{IP}(\tilde{\beta}) = \sup\{z_{LP}(d^\ell) - z_{IP}(b^\ell) = \Delta_{SAH}$ , by Corollary 9. Let  $\tilde{\phi} = z_{IP}$ ,  $\tilde{\psi}(\tilde{\beta}) = z_{LP}(r(\tilde{\beta})) - z_{IP}(\tilde{\beta})$ , and  $\tilde{\psi}(\beta) = 0$ , for all  $\beta \in \widehat{\mathcal{B}}(0, b) \setminus \tilde{\beta}$ . It is immediate that  $\tilde{\phi} \in \Phi(b)$  (Proposition 2). By construction,  $\tilde{\psi}$  satisfies (8b). For all  $\beta \in \widehat{\mathcal{B}}(0, b) \setminus \tilde{\beta}$  and  $k \in \mathcal{K}$ ,  $\tilde{\psi}(\beta) = 0 \leq z_{LP}(r(\beta)) - z_{IP}(\beta) \leq r(\beta)^T v^k - \tilde{\phi}(\beta)$ . Additionally,  $\tilde{\psi}(\tilde{\beta}) = z_{LP}(r(\tilde{\beta})) - z_{IP}(\tilde{\beta}) \leq r(\tilde{\beta})^T v^k - \tilde{\phi}(\tilde{\beta})$ , for all  $k \in \mathcal{K}$ . Hence,  $(\tilde{\phi}, \tilde{\psi})$  is feasible for (8).

Let  $(\bar{\phi}, \bar{\psi})$  be feasible for (8). Then  $\bar{\psi}(\beta) = 0$  for all  $\beta \in \widehat{\mathcal{B}}(0, b) \setminus \bar{\beta}$  for some  $\bar{\beta} \in \widehat{\mathcal{B}}(0, b)$ . Because  $\bar{\phi} \in \Phi(b)$ , by Corollary 3,  $\bar{\phi}(\beta) \geq z_{IP}(\beta)$  for all  $\beta \in \widehat{\mathcal{B}}(0, b)$ . Let  $k^* \in \arg \min\{r(\bar{\beta})^T v^k \mid k \in \mathcal{K}\}$ . By (8a),  $\bar{\psi}(\bar{\beta}) \leq r(\bar{\beta})^T v^{k^*} - \bar{\phi}(\bar{\beta}) \leq z_{LP}(r(\bar{\beta})) - z_{IP}(\bar{\beta}) \leq z_{LP}(r(\bar{\beta})) - z_{IP}(\bar{\beta}) = \tilde{\psi}(\bar{\beta})$ . Hence,  $\sum_{\beta \in \widehat{\mathcal{B}}(0, b)} \bar{\psi}(\beta) \geq \sum_{\beta \in \widehat{\mathcal{B}}(0, b)} \tilde{\psi}(\beta)$ . This proves  $(\tilde{\phi}, \tilde{\psi})$  is optimal for (8). Further,  $\delta_{SAH} = \sum_{\beta \in \widehat{\mathcal{B}}(0, b)} \tilde{\psi}(\beta) = \tilde{\psi}(\tilde{\beta}) = \Delta_{SAH}$ .  $\square$

**PROPOSITION 13** *The infimum of the absolute gap function over  $\mathcal{B}(0, b) \setminus \mathcal{B}(0, 1)$  can be computed by considering only the integral points in  $\mathcal{B}(0, b)$ . Specifically,  $\inf_{\beta \in \mathcal{B}(0, b) \setminus \mathcal{B}(0, 1)} \Gamma(\beta) = \min_{\beta \in \widehat{\mathcal{B}}(0, b) \setminus \{0\}} \Gamma(\beta)$ . Further, (5) can be used to compute  $\Delta_{IAH} = \inf_{\beta \in \mathcal{B}(0, b) \setminus \mathcal{B}(0, 1)} \Gamma(\beta)$ .*

*Proof:* Let  $\beta \in \mathcal{B}(0, b) \setminus \mathcal{B}(0, 1)$ , then  $\Gamma(\beta) = z_{LP}(\beta) - z_{IP}(\beta) = z_{LP}(\beta) - z_{IP}(\lfloor \beta \rfloor) \geq z_{LP}(\lfloor \beta \rfloor) - z_{IP}(\lfloor \beta \rfloor) = \Gamma(\lfloor \beta \rfloor)$ . Because  $\beta \in \mathcal{B}(0, b) \setminus \mathcal{B}(0, 1)$ ,  $\lfloor \beta \rfloor \in \widehat{\mathcal{B}}(0, b) \setminus \{0\}$ . In addition, for any  $\beta' \in \widehat{\mathcal{B}}(0, 1)$  and  $\epsilon > 0$ , using arguments similar to those in Lemma EC.3, from the continuity of  $z_{LP}$  and the fact that  $z_{IP}(\tilde{\beta}) = z_{IP}(\beta')$ , there exists  $\tilde{\beta} \in (\mathcal{B}(\beta', \beta' + 1))^\circ \subset \mathcal{B}(0, b) \setminus \mathcal{B}(0, 1)$  such that  $\Gamma(\tilde{\beta}) - \Gamma(\beta') < \epsilon$ . Hence,  $\Delta_{IAH} = \inf_{\beta \in \mathcal{B}(0, b) \setminus \mathcal{B}(0, 1)} \Gamma(\beta) = \min_{\beta \in \widehat{\mathcal{B}}(0, b) \setminus \{0\}} \Gamma(\beta) = \Delta_{IAD}$ , by Proposition 8.  $\square$

## EC.4. Section 5 Results

**PROPOSITION 14** *The optimal objective value of (9) is  $\mathbb{E}_{\xi^{(1)}}(\gamma(\xi^{(1)}))$ .*

*Proof:* Let  $(\tilde{\phi}, \tilde{\psi}) = (z_{IP}, \gamma)$ . It is immediate that  $\tilde{\phi} \in \Phi(b)$  (Proposition 2). Also, for each  $\beta \in \widehat{\mathcal{B}}^+(0, b)$ ,  $\gamma(\beta) \cdot \beta^T v^k \geq \gamma(\beta) \cdot z_{LP}(\beta) = z_{IP}(\beta) = \tilde{\phi}(\beta)$ , for all  $k \in \mathcal{K}$ . Hence,  $(\tilde{\phi}, \tilde{\psi})$  is feasible for (9).

Let  $(\bar{\phi}, \bar{\psi})$  be feasible for (9). Because  $\bar{\phi} \in \Phi(b)$ , by Corollary 3,  $\bar{\phi}(\beta) \geq z_{IP}(\beta)$ , for all  $\beta \in \widehat{\mathcal{B}}^+(0, b)$ . By (9b),  $\bar{\psi}(\beta) \geq \frac{\bar{\phi}(\beta)}{\beta^T v^k}$ , for all  $k \in \mathcal{K}$ , which implies  $\bar{\psi}(\beta) \geq \frac{\bar{\phi}(\beta)}{z_{LP}(\beta)} \geq \gamma(\beta) = \tilde{\psi}(\beta)$ . Therefore,

$\sum_{\beta \in \widehat{\mathcal{B}}^+(0,b)} \mu^{(1)}(\beta) \bar{\psi}(\beta) \geq \sum_{\beta \in \widehat{\mathcal{B}}^+(0,b)} \mu^{(1)}(\beta) \tilde{\psi}(\beta)$ , and  $(\tilde{\phi}, \tilde{\psi})$  is optimal. Thus, the optimal objective value is  $\sum_{\beta \in \widehat{\mathcal{B}}^+(0,b)} \mu^{(1)}(\beta) \tilde{\psi}(\beta) = \sum_{\beta \in \widehat{\mathcal{B}}^+(0,b)} \mu^{(1)}(\beta) \gamma(\beta) = \mathbb{E}_{\xi^{(1)}}(\gamma(\beta))$ .  $\square$

**COROLLARY 10** *Suppose  $\mu^{(1)}(\beta) > 0$  for all  $\beta \in \widehat{\mathcal{B}}^+(0,b)$ . Then, any feasible solution  $(\bar{\phi}, \bar{\psi})$  in which  $\bar{\phi} \neq z_{IP}$  is not optimal for (9).*

We omit the proof of Corollary 10 due to reasoning similar to that of Corollary 5.

The variance of the relative gap function, denoted by  $\sigma_\gamma^2$ , indicates the extent to which this approximation error varies over  $\widehat{\mathcal{B}}^+(0,b)$ . The variance can be calculated from optimal solutions of (9).

**COROLLARY 11** *Let  $(\tilde{\phi}, \tilde{\psi})$  be an optimal solution to (9) and  $\delta_{ERD}$  the optimal objective value. Then the variance of the relative gap over  $\widehat{\mathcal{B}}(0,b)$  can be calculated as follows:*

$$\sigma_\gamma^2 = \sum_{\beta \in \widehat{\mathcal{B}}^+(0,b)} \mu^{(1)}(\beta) (\tilde{\psi}(\beta))^2 - \delta_{ERD}^2.$$

The proof of Corollary 11 is similar to that of Corollary 6 and is omitted.

**PROPOSITION 15** *The optimal objective value of (10) is  $\Delta_{SRD}$ .*

The proof is similar to that of Proposition 8 and is omitted.

**PROPOSITION 16** *The optimal objective value of (11) is  $1 - \Delta_{IRD}$ .*

The proof is similar to that of Proposition 7 and is omitted.

## EC.5. Section 6 Results

**PROPOSITION 17** *The supremum of the relative gap function over  $\mathcal{B}(0,b)^+$  can be computed by only considering the integral points. Specifically,  $\sup_{\beta \in \mathcal{B}^+(0,b)} \gamma(\beta) = \max_{\beta \in \widehat{\mathcal{B}}^+(0,b)} \gamma(\beta)$ . Further, (10) can be used to compute  $\Delta_{SRH} = \sup_{\beta \in \mathcal{B}^+(0,b)} \gamma(\beta)$ .*

*Proof:* For any  $\beta \in \mathcal{B}^+(0,b)$ ,  $\gamma(\beta) = \frac{z_{IP}(\beta)}{z_{LP}(\beta)} = \frac{z_{IP}(\lfloor \beta \rfloor)}{z_{LP}(\beta)} \leq \frac{z_{IP}(\lfloor \beta \rfloor)}{z_{LP}(\lfloor \beta \rfloor)}$ , and because  $\beta \in \mathcal{B}^+(0,b)$ ,  $\lfloor \beta \rfloor \in \widehat{\mathcal{B}}^+(0,b)$ . Hence,  $\Delta_{SRH} = \sup_{\beta \in \mathcal{B}^+(0,b)} \gamma(\beta) = \max_{\beta \in \widehat{\mathcal{B}}^+(0,b)} \gamma(\beta) = \Delta_{SRD}$ , by Proposition 12.  $\square$

**PROPOSITION 18** *For any unit hyper-cube  $\mathcal{B}^l$ ,  $\inf_{\beta} \{\gamma(\beta) \mid \beta \in \mathcal{B}^l\} = z_{IP}(b^l)/z_{LP}(d^l)$ .*

*Proof:* For any  $\beta \in \mathcal{B}^l$ ,  $z_{LP}(\beta) \leq z_{LP}(d^l)$  and  $z_{IP}(b^l) \leq z_{IP}(\beta)$ , which implies  $z_{IP}(\beta)/z_{LP}(\beta) \geq z_{IP}(b^l)/z_{LP}(d^l)$ . Fix  $\epsilon > 0$ . By Lemma EC.3, there exists  $\beta^* \in (\mathcal{B}^l)^\circ$  such that  $z_{LP}(d^l) - z_{LP}(\beta^*) \leq \frac{\epsilon z_{LP}(d^l) z_{LP}(b^l)}{z_{IP}(b^l) + 1}$ . Then,

$$\begin{aligned} \frac{z_{IP}(\beta^*)}{z_{LP}(\beta^*)} - \frac{z_{IP}(b^l)}{z_{LP}(d^l)} &= \frac{z_{IP}(b^l)}{z_{LP}(d^l)} \cdot \frac{z_{LP}(d^l) - z_{LP}(\beta^*)}{z_{LP}(\beta^*)} \\ &\leq \frac{z_{IP}(b^l)}{z_{LP}(d^l)} \cdot \frac{z_{LP}(d^l) - z_{LP}(\beta^*)}{z_{LP}(b^l)} \\ &\leq \frac{z_{IP}(b^l)}{z_{LP}(d^l) z_{LP}(b^l)} \cdot \frac{z_{LP}(d^l) z_{LP}(b^l)}{z_{IP}(b^l) + 1} \cdot \epsilon \\ &< \epsilon. \end{aligned}$$

By definition of infimum,  $z_{IP}(b^l)/z_{LP}(d^l) = \inf_{\beta \in \mathcal{B}^l} \gamma(\beta)$ . □

COROLLARY 12  $\Delta_{IRH} = \inf_{\beta \in \mathcal{B}^+(0,b)} \gamma(\beta) = \inf_{l \in \{1, \dots, L\}} z_{IP}(b^l)/z_{LP}(d^l)$ .

Corollary 12 follows from Proposition 18, and we omit the proof.

PROPOSITION 19  $\delta_{IRH} = 1 - \Delta_{IRH}$ .

*Proof:* Let  $\tilde{\beta} \in \arg \min_{\beta \in \widehat{\mathcal{B}}^+(0,b)} \{z_{IP}(\beta)/z_{LP}(r(\beta))\}$ ,  $\tilde{\psi}(\beta) = 1 - \Delta_{IRH}$ , if  $\beta = \tilde{\beta}$  and 0 otherwise, and let  $\tilde{\phi} = z_{IP}$ . It is immediate that  $\tilde{\phi} \in \Phi(b)$  (Proposition 2). Observe that  $(1 - \tilde{\psi}(\tilde{\beta}))r(\tilde{\beta})^T v^k = \Delta_{IRH} r(\tilde{\beta})^T v^k \geq \Delta_{IRH} z_{LP}(r(\tilde{\beta})) = z_{IP}(\tilde{\beta}) \geq \tilde{\phi}(\tilde{\beta})$ , for all  $k \in \mathcal{K}$ . Further, for all  $\beta \in \widehat{\mathcal{B}}^+(0,b) \setminus \tilde{\beta}$ ,  $(1 - \tilde{\psi}(\beta))r(\beta)^T v^k \geq z_{LP}(r(\beta)) \geq z_{IP}(\beta) = \tilde{\phi}(\beta)$ , for all  $k \in \mathcal{K}$ . Thus,  $(\tilde{\phi}, \tilde{\psi})$  is feasible.

Let  $(\bar{\phi}, \bar{\psi})$  be feasible for (12). For all  $\beta \in \widehat{\mathcal{B}}^+(0,b), k \in \mathcal{K}$ ,  $(1 - \bar{\phi}(\beta))r(\beta)^T v^k \geq \bar{\phi}(\beta) \geq z_{IP}(\beta)$ , because  $\bar{\phi} \in \Phi(b)$ . By (12a),  $1 - \bar{\phi}(\beta) \geq \frac{\bar{\phi}(\beta)}{r(\beta)^T v^k} \geq \frac{z_{IP}(\beta)}{r(\beta)^T v^k}$ , which implies  $1 - \bar{\psi}(\beta) \geq \gamma(\beta) \geq \Delta_{IRH}$ . Because  $\bar{\psi}(\beta) > 0$  for at most one  $\beta \in \widehat{\mathcal{B}}^+(0,b)$ ,  $\sum_{\beta \in \widehat{\mathcal{B}}^+(0,b)} \bar{\psi}(\beta) \leq 1 - \Delta_{IRH} = \sum_{\beta \in \widehat{\mathcal{B}}^+(0,b)} \tilde{\psi}(\beta)$ . Hence,  $(\tilde{\phi}, \tilde{\psi})$  is an optimal solution. □
